# Supplementary material
Source: PubMed Central journal article supplement (PMC3460616)
Supplement: Supp_Fig1.pdf [file Supp_Fig1.pdf]

AAGAGGGGAGGAGCCAAGATGGCCGAATAGGAACAGCTCCGGTCTACAGCTCCCAGCGTG  
GCGACGCAGAAGACGGGTGATTTCTGCATTTCCATCTGAGGTACCGGGTTCATCTCACTA  
GGGAGTGCCAGACAGTGGGCGCAGGTCAGTGGGTGCGGCGCACCGTGC GCGAGCCGAAGC  
AGGGCGAGGCATTGCCTCACTTGGGAAGCGCAAGGGGTCAGGGAGTTCCTTTCCGAGTC  
AAAGAAAGGGGTGACGGACGGCACCTGGAAAATCGGGTCACTCCCACCCGAATACTGCGC  
TTTTCCGACCGGCTTAAAAAACGGGCGCACCACGAGATTATATCCCGCACCTGGCTCGGAG  
GGTCTTACGCCACGGAGTCTCGCTGATTGCTAGCACAGCAGTCTGAGATCAAAGTCAA  
GGCGGCAGCGAGGCTGGGGGGAGGGGCGCCCGCCATTGCCAGGCTTGCTTAGGTAAACA  
AAGCAGCCGGGAAGCTCGAACTGGGTGGAGCCCACCACAGCTCAAGGAGGCCTGCCTGCC  
TCTGTAGGCTCCACCTCTGGGGGCAGGGCACAGACAAACAAAAAGACAGCAGTAACCTCT  
GCAGACTTAAATGTCCCTGTCTGACAGCTTTGAAGAGAGCAGTGGTTCCTCCAGCACGCA  
GCTGGAGATCTGAGAACGGGCAGACTGC **CTCCTCAAGTGGGTC** CCTGACC**CCTGACCCCC**  
**GAGCA**GCCTAACTGGGAGGCACCCCCCAGCAGGGGCACACTGACACCTCACACGGCAGG  
GTATTCCAACAGACCTGCAGCTGAGGGTCTGTCTGTTAGAAGGAAAATAACAAACAGA  
AAGGACATCCACACCAAAAACCCATCTGTACATCACCATCATCAAAGACCAAAAGTAGAT  
AAAACCACAAAG

**SUPPLEMENTARY FIG. S1.** DNA consensus of the L1PA2 5'UTR promoter region, generated by CLUSTALX alignment of 2230 sequences, obtained from Human Genome Build 16.
