# Supplementary material
Source: PubMed Central journal article supplement (PMC3460616)
Supplement: Supp_Fig2.pdf [file Supp_Fig2.pdf]

ATGGCCCAGGCGGCCCTCGAGCCCGGGGAGAAGCCCTATGCTTGTCCGGAATGTGGTAAGTCCT  
TCAGTCAATCCGGTGATTTGCGCAGACACCAGCGTACCCACACGGGTGAAAAACCGTATAAATG  
CCCAGAGTGC GGCAAATCTTTTAGTCAGTCAGGGCATCTGACTGAGCATCAACGCACTCATACT  
GGCGAGAAGCCATACAAATGTCCAGAATGTGGCAAGTCTTTCAGTCTAAAAAGCACCTTGCCG  
AACACCAACGTACTCACACCGGGGAGAAGCCCTATGCTTGTCCGGAATGTGGTAAGTCCTTCTC  
TGATCCTGGCAACCTCGTGAGACACCAGCGTACCCACACGGGTGAAAAACCGTATAAATGCCCA  
GAGTGC GGCAAATCTTTTAGTACCAAGAATTCCCTGACTGAGCATCAACGCACTCATACTGGCA  
AAAAACTAGTGGCCAGGCCGGCCAGGCTAGCCCGAAAAAGAAACGCAAAGTTGGGC

**SUPPLEMENTARY FIG. S2.** Zinc finger-1 (ZF1) DNA sequence.
