# Supplementary material
Source: PubMed Central journal article supplement (PMC3460616)
Supplement: Supp_Fig3.pdf [file Supp_Fig3.pdf]

ATGGCCCAGGCGGCCCTCGAGCCCAGGAGAGCCCTATGCTTGTCCGGAATGTGGTAAGTCCT  
TCAGTAGATCTGACAACCTGGTCCGTCACCAGCGTACCCACACGGGTGAAAAACCGTATAAATG  
CCCAGAGTGCGGCAAATCTTTTAGTCGGTCCGATAATCTCGTGCGCCATCAACGCACTCATACT  
GGCGAGAAGCCATACAAATGTCCAGAATGTGGCAAGTCTTTCAGTACCACGGGGCCTTGACCG  
AGCACCAACGTACTCACACCGGGGAGAAGCCCTATGCTTGTCCGGAATGTGGTAAGTCCTTCTC  
TACTAGCCACTCTCTGACAGAACACCAGCGTACCCACACGGGTGAAAAACCGTATAAATGCCCA  
GAGTGCGGCAAATCTTTTAGTGACCCAGGCAACCTCGTCCGCCATCAACGCACTCATACTGGCA  
AAAAAACTAGTGGCCAGGCGGCCAGGCTAGCCCCGAAAAAGAAACGCAAAGTTGGGC

**SUPPLEMENTARY FIG. S3.** Zinc finger-2 (ZF2) DNA sequence.
