# Supplementary material
Source: PubMed Central journal article supplement (PMC3460616)
Supplement: Supp_Fig4.pdf [file Supp_Fig4.pdf]

MGGSHHHHHHGMASMTGGQQMGRDLYDDDDKVPKPKKRRKV<sup>(42)</sup>AQAALPEGEKPYACPECGKS  
FSQSGDLRRHQRTHTGEKPYKCECGKSFSSQSGHLTEHQRTHTGEKPYKCECGKSFSSKKHLA  
EHQRTHTGEKPYACPECGKSFSDPGNLVRHQRTHTGEKPYKCECGKSFSTKNSLTEHQRTHTG  
KKTSGQAG<sup>(198)</sup>EDAKNIKKGPAPFYPLEDGTAGEQLHKAMKRYALVPGTIAFTDAHIEVNITYA  
EYFEMSVRLAEAMKRYGLNTNHRIVVCSSENSLQFFMPVLGALFIGVAVAPANDIYNERELLNSM  
NISQPTVVFVSKKGLQKILNVQKLPITIQKIIIMDSKTDYQGFQSMYTFVTSHLPPGFNEYDFV  
PESFDRDKTIALIMNSSGSTGLPKGVALPHRTACVRFSHARDPIFGNQIIPDTAILSVPFHHG  
FGMFTTLGYLICGFRVLMYRFEEELFLRSLQDYKIQSALLVPTLFSFFAKSTLIDKYDLSNLH  
EIASGGAPLSKEVGEAVAKRFHLPGIRQGYGLTETTSAILITPEGDDKPGAVGKVVPPFEAKVV  
DLDTGKTLGVNQRGELCVRGPMIMSGYVNNPEATNALIDKDGWLHSGDIAYWDEDEHFFIVDRL  
KSLIKYKGYQVAPAELESILLQHPNIFDAGVAGLPDDDAGELPAAVVVLEKGCFAKGTNVLMD  
GSIECIENIEVGNKVMGKDGRPREVIKLRGRETMYSVVQKSQHRAHKSDSSREVPELLKFTCN  
ATHELVVRTPRSVRRLSRTIKGVEYFEVITFEMGQKKAPDGRIVELVKEVSKSYPISEGP  
ELVESYRKASNKAYFEWTIEARDLSLLGSHVRKATYQTYAPILY<sup>(871)</sup>

**SUPPLEMENTARY FIG. S4.** DGnA biosensor module 1 (His\_NLS\_ZF1\_NLuc\_NInt) amino acid sequence. ZF1, residue(42–198); NLuc\_NInt, residue(199–871). DGnA, DNA-guided nano-assembly.
