# Supplementary material
Source: PubMed Central journal article supplement (PMC3460616)
Supplement: Supp_Fig5.pdf [file Supp_Fig5.pdf]

MGGSHHHHHHGMASMTGGQQMGRDLYDDDDKVPGSPKKKRKV<sup>(42)</sup>AQAALPEGEKPYACPECGKS  
FSRSDNLVRHQRTHTGEKPYKCECGKSFSDNLVRHQRTHTGEKPYKCECGKSFSTTGALT  
EHQRTHTGEKPYACPECGKSFSTSHSLTEHQRTHTGEKPYKCECGKSFSDPGLNVRHQRTHTG  
KKTSGQAGGGGS<sup>(203)</sup>VLLNVLSKAGSKKFRPAPAAAFARECRGFYFELQELKEDDYGITLS  
DDSDHQFLLANQVVVHNCTMTEKEIVDYVASQVTTAKKLRGGVVFVDEVPKGLTGKLDARKIRE  
ILIKAKKGGKIAV<sup>(328)</sup>

**SUPPLEMENTARY FIG. S5.** DGnA biosensor module 2 (His\_NLS\_ZF2\_CInt\_CLuc) amino acid sequence. ZF2, residues(43–203); CInt\_Cluc, residues(204–328).
