# Supplementary material
Source: PubMed Central journal article supplement (PMC3460616)
Supplement: Supp_Table1.pdf [file Supp_Table1.pdf]

SUPPLEMENTARY TABLE S1. BIOTINYLATED HAIRPIN DNA OLIGOS FOR ZINC FINGER BIOSENSOR TARGET 1 AND TARGET 2

---

|          |                                                              |
|----------|--------------------------------------------------------------|
| ZF1tg    | Bio-ggt <b>CCTGACCCCGAGCA</b> AGGTTTTTCCTTGCTCGGGGGTCAGGacc  |
| ZF1tg.m1 | Bio-ggt <b>CCTGACCCTGAGCA</b> AGGTTTTTCCTTGCTCAGGGGGTCAGGacc |
| ZF1tg.m2 | Bio-ggt <b>CCTGACCCCAAGCA</b> AGGTTTTTCCTTGCTTGGGGGGTCAGGacc |
| ZF1tg.m3 | Bio-ggt <b>CCTGACCATAAGCA</b> AGGTTTTTCCTTGCTTATGGGGTCAGGacc |
| ZF2tg    | Bio-ggt <b>CTCCTCAAGTGGGT</b> CAGGTTTTTCCTGACCCACTTGAGGAGacc |
| ZF2tg.m1 | Bio-ggt <b>AAACTCAAGTGGGT</b> CAGGTTTTTCCTGACCCACTTGAGTTTacc |
| ZF2tg.m2 | Bio-ggt <b>AAACTCAAATGGGT</b> CAGGTTTTTCCTGACCCATTTGAGTTTacc |

---
